# Supplementary material
Source: PubMed Central journal article supplement (PMC6597501)

Relative expression under heat-shock/(*ef1a*)

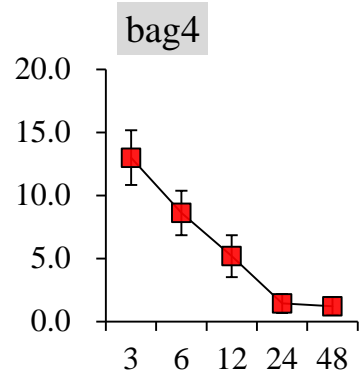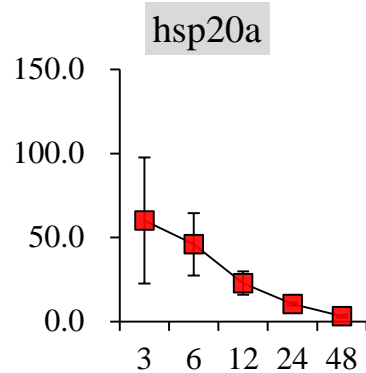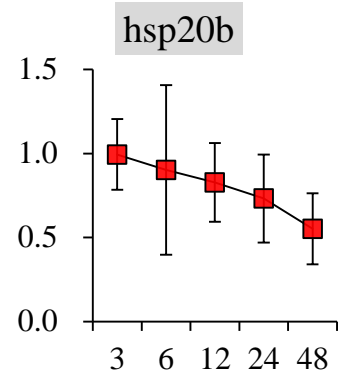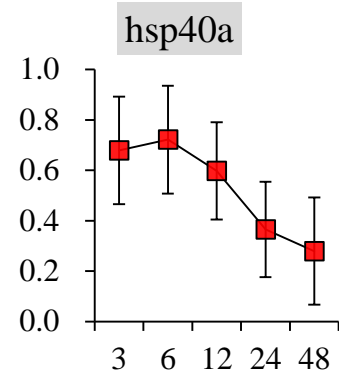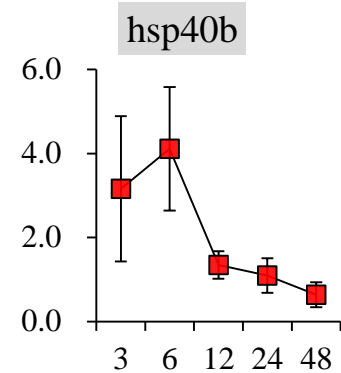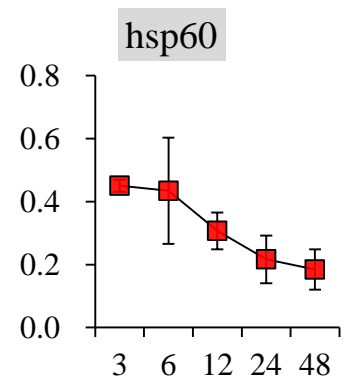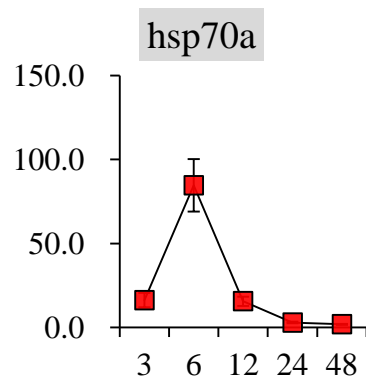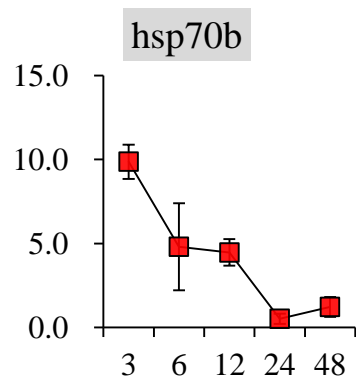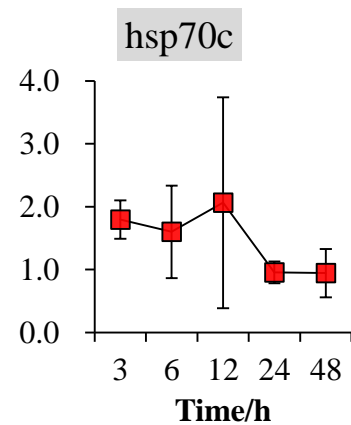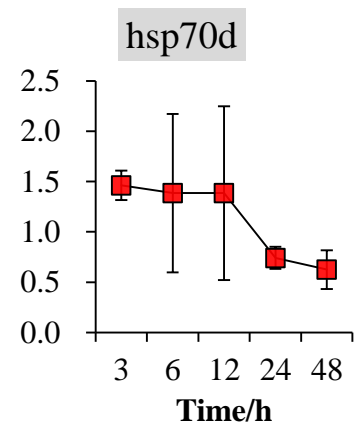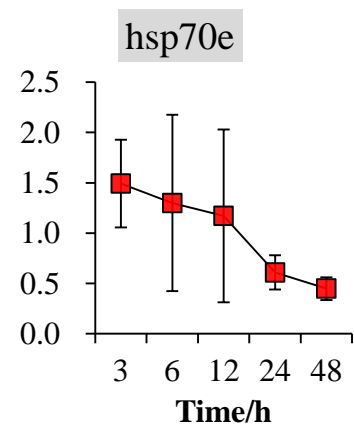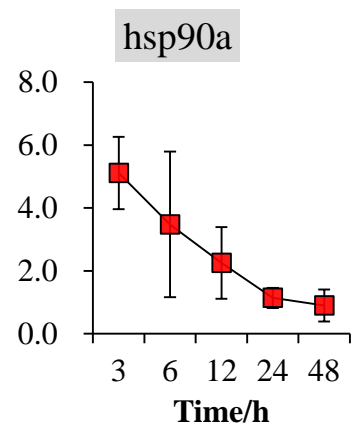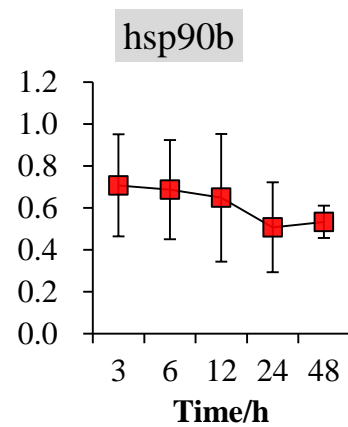

Supplement: rsbl20190202supp1.pdf [file rsbl20190202supp1.pdf]
